# Supplementary material for: The Role of Gender Power Relations on Women’s Health Outcomes: Evidence from a Maternal Health Coverage Survey in Simiyu Region, Tanzania
Source: Research Square preprint supplement (doi:10.21203/rs.3.rs-116776/v1), 2020-12-09
Supplement: Supplementary file 1 [file cd6cf310b5a3b83cf2450997.docx]

**Supplement S1. Title Page.**

**TITLE**: The role of gender power relations on women’s health outcomes: evidence from a maternal health coverage survey in Simiyu region, Tanzania

**AUTHORS:** Henri Garrison-Desany*1, Emily Wilson1, Melinda Munos1, Talata Sawadogo-Lewis1, Abdoulaye Maïga1, Onome Ako2, Serafina Mkuwa3, Amy J. Hobbs1, Rosemary Morgan1

1Department of International Health, Johns Hopkins Bloomberg School of Public Health, 615 North Wolfe St., Baltimore, MD, 21205, USA.

2Amref Health Africa Canada, 489 College Street, Toronto, ON, M6G 1A5, Canada

3Amref Health African Tanzania, Ali Hassan Mwinyi Road, Dar es Salaam, Tanzania

*Corresponding author, email: garrisondesany@jhu.edu

**Supplement S2. Link to RADAR coverage survey questionnaire including questions used in gender analysis.**

The RADAR Coverage Survey questionnaire and training materials is available at <https://www.radar-project.org/coverage-survey>.

Additional details of the gender analytic portion of the coverage survey is available for download at <https://www.radar-project.org/s/Example-Gender-Indicators2_2020Jun21.docx>.
